# Supplementary material for: Virologic characterization of symptom rebound following nirmatrelvir-ritonavir treatment for COVID-19
Source: bioRxiv or medRxiv preprint supplement (doi:10.1101/2022.05.24.22275326), 2022-05-26
Supplement: Supplementary file [file media-1.pdf]

**Supplemental Table 1.** Cohort Characteristics

| ID | Gender | Age Range | Completed COVID-19 Vaccinations at Enrollment | Days from End of N/R Therapy to Symptom Relapse | Days from End of N/R Therapy to Antigen Positivity | Days from End of N/R Therapy to Study Enrollment | Enrollment Viral Load (Log10 copies/mL) | Days from Diagnosis to Negative PCR | Positive Culture After Relapse (Y/N) | Days from Diagnosis to Negative Viral Culture |
|----|--------|-----------|-----------------------------------------------|-------------------------------------------------|----------------------------------------------------|--------------------------------------------------|-----------------------------------------|-------------------------------------|--------------------------------------|-----------------------------------------------|
| 1  | F      | 31-35     | 4                                             | 4                                               | 5                                                  | 9                                                | 4.7                                     | 20                                  | N                                    | N/A                                           |
| 2  | M      | 51-55     | 3                                             | 5                                               | 5                                                  | 8                                                | 6.8                                     | 23                                  | Y                                    | 16                                            |
| 3  | F      | 46-50     | 3                                             | 7                                               | 4                                                  | 7                                                | 4.2                                     | 23                                  | N                                    | N/A                                           |
| 4  | F      | 51-55     | 5                                             | 4                                               | 4                                                  | 7                                                | 6.1                                     | 18                                  | N                                    | N/A                                           |
| 5  | F      | 46-50     | 4                                             | 2                                               | 5                                                  | 6                                                | 7.3                                     | 16                                  | Y                                    | 14                                            |
| 6  | F      | 61-65     | 3                                             | 3                                               | 6                                                  | 8                                                | 4.9                                     | 19                                  | N                                    | N/A                                           |
| 7  | F      | 36-40     | 3                                             | 6                                               | 8                                                  | 10                                               | 7.1                                     | 19                                  | Y                                    | 19                                            |

N/R: nirmatrelvir-ritonavir

N/A: not applicable

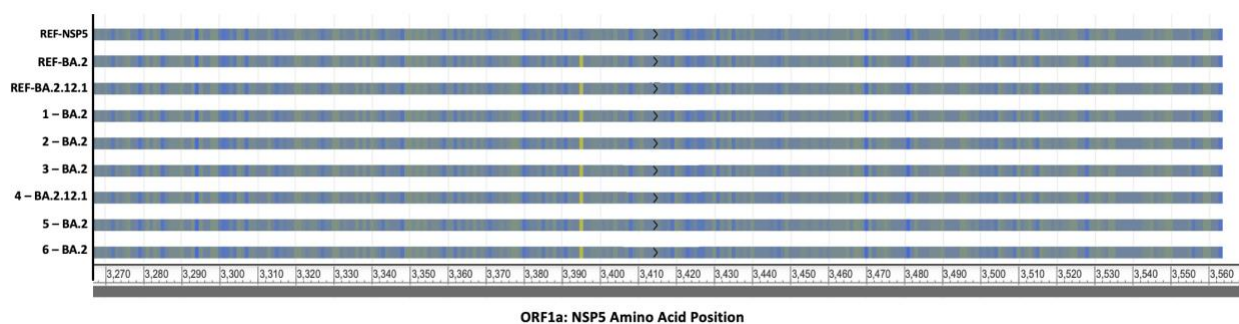

**Supplemental Figure 1.** Amino acid sequence of NSP5 (main viral protease, or Mpro) for individuals with recurring infection following nirmatrelvir-ritonavir treatment, compared to reference WT genome (GenBank YP\_009725301.1). Ref-BA.2 (USA/MA-MGB-06410/2022) and Ref-BA.2.12.1 (USA/MA-MGB-05617/2022) genomes were collected via MGH surveillance sequencing and used as lineage-specific references. No mutations were found in drug-resistance conferring regions of the NSP5 gene of the six sequenced specimens.
